# Supplementary material
Source: Springer Nature journal article supplement (https://www.springermedizin.de/resource/supplementary/12880_2010_101_MOESM2_ESM.pdf/9449998)

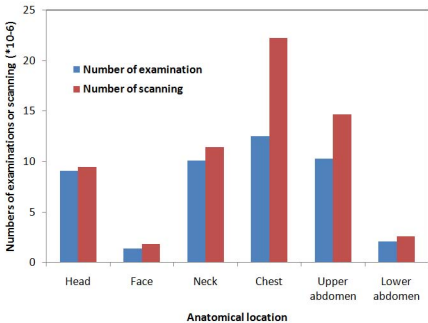

Supplement: MOESM2 [file 9449998]
